# Supplementary material
Source: PubMed Central journal article supplement (PMC4367234)
Supplement: Supp_Fig1.pdf [file Supp_Fig1.pdf]

## Supplementary Data

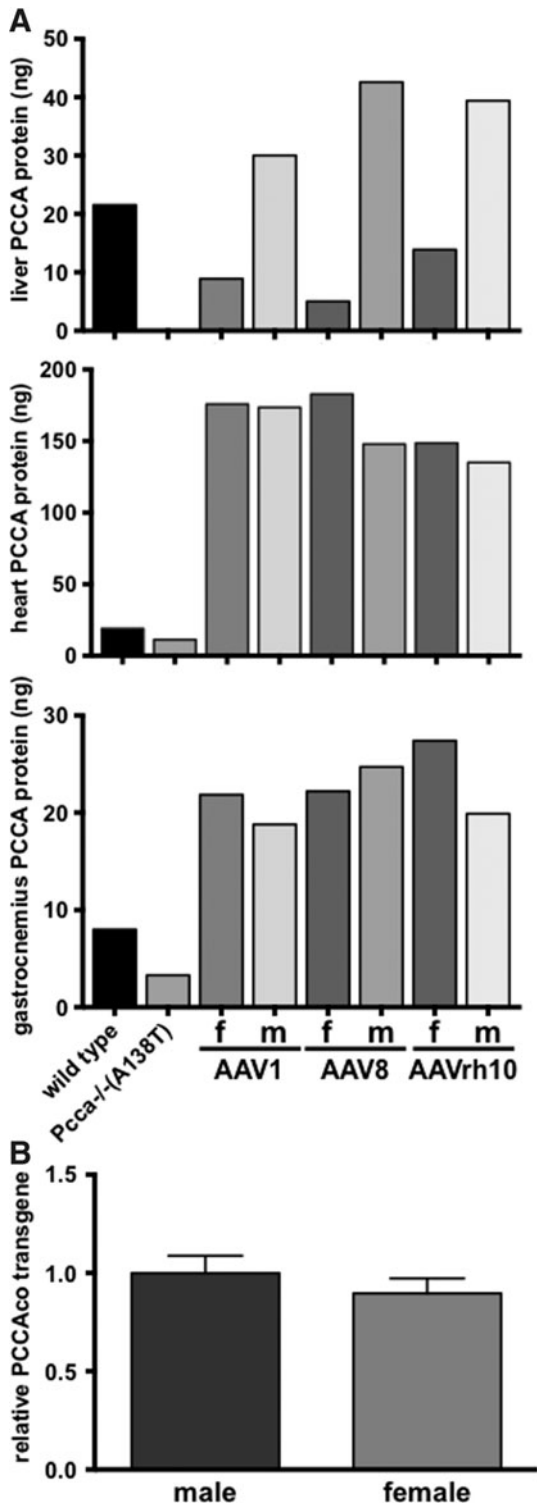

**SUPPLEMENTARY FIG. S1.** Vector copy analysis. **(A)** Quantitation of selected Western blot images from Fig. 3 was performed based on 50 ng of a PCCA protein standard. **(B)** Twenty-five days after IV administration of  $5 \times 10^{11}$  vg of AAV-PCCAcO, livers were removed from male and female *Pcca*<sup>-/-</sup>(A138T) mice. DNA was isolated and qPCR specific for PCCAcO transgene and a mouse transferrin receptor (Tfrc) reference gene was performed for data normalization.
