# Supplementary material
Source: PubMed Central journal article supplement (PMC4367234)
Supplement: Supp_Fig2.pdf [file Supp_Fig2.pdf]

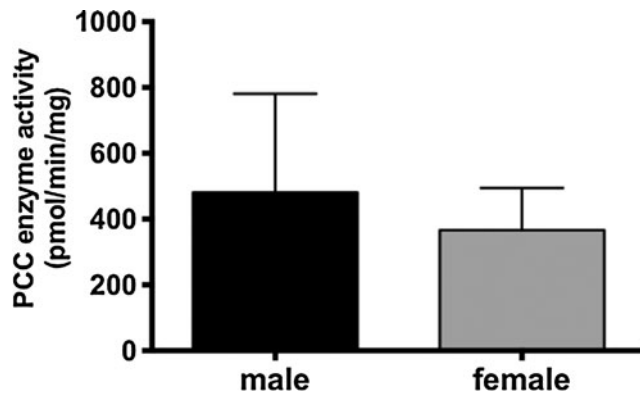

**SUPPLEMENTARY FIG. S2.** Liver propionyl-CoA carboxylase (PCC) activity in aged *Pcca*<sup>-/-</sup>(A138T) mice. Liver PCC activity was measured in 1.5-year-old untreated male and female *Pcca*<sup>-/-</sup>(A138T) mice. *N*=10 for each group. Liver DNA from untreated *Pcca*<sup>-/-</sup>(A138T) male and female mice (*N*=5 each) was also analyzed, but no PCCAcO signal was detected.
